# Supplementary material
Source: Springer Nature journal article supplement (https://www.springermedizin.de/resource/supplementary/12936_2012_2197_MOESM6_ESM.pdf/9542640)

A.

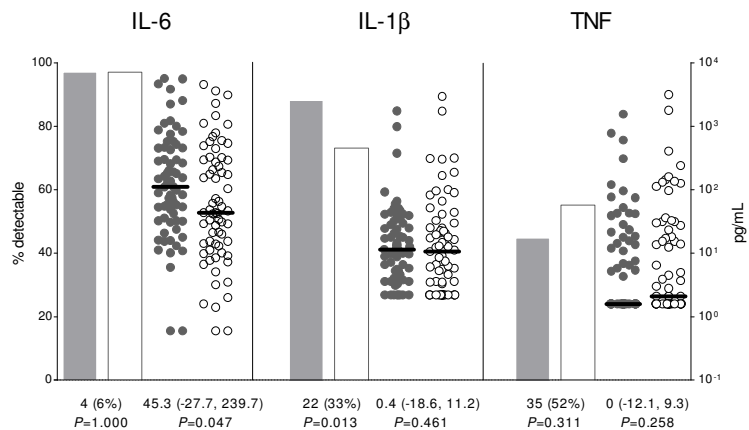

B.

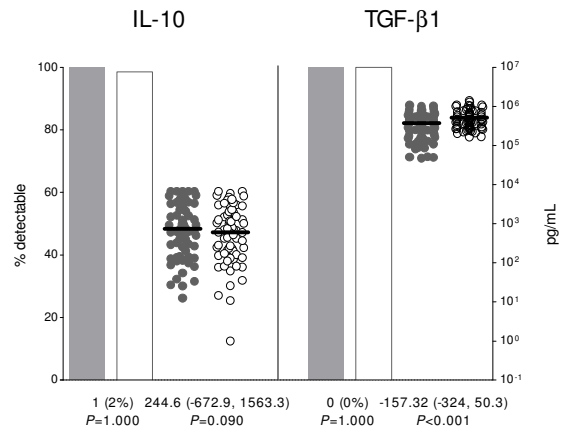

C.

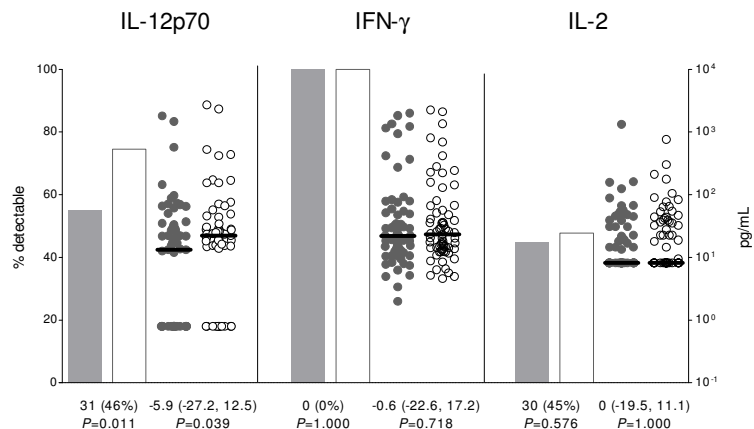

D.

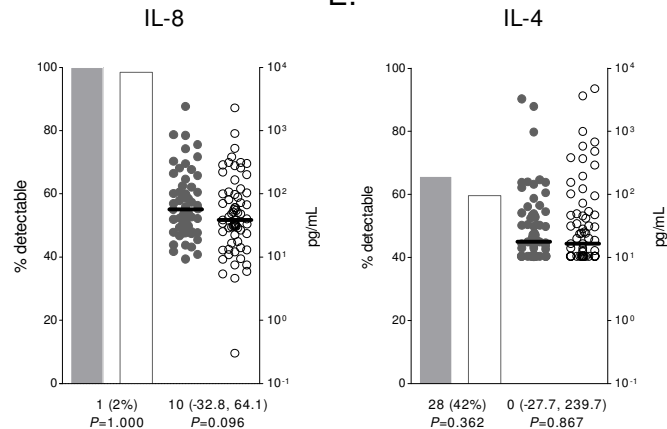

Supplement: MOESM6 [file 9542640]
